# Supplementary material for: Magnetic studies of mesoporous nanostructured iron oxide materials synthesized by one-step soft-templating
Source: Royal Society of Chemistry journal article supplement (doi:10.1039/c5dt01388g), 2015-01-01
Supplement: c5dt01388g1.pdf [file c5dt01388g1.pdf]

## Supplementary Information

### Magnetic Studies of Mesoporous Nanostructured Iron Oxide Materials Synthesized by One-Step Soft-Templating

Jing Jin,<sup>a</sup> William A. Hines,<sup>b</sup> Chung-Hao Kuo,<sup>c</sup> David M. Perry,<sup>b</sup> Altug S. Poyraz,<sup>c</sup> Yan Xia,<sup>d</sup> Taha Zaidi,<sup>b</sup> Mu-Ping Nieh,<sup>ade</sup> and Steven L. Suib<sup>†ac</sup>

<sup>a</sup> Institute of Materials Science, University of Connecticut, Storrs, CT 06269-3136.

<sup>b</sup> Department of Physics, University of Connecticut, Storrs, CT 06269-3046.

<sup>c</sup> Department of Chemistry, University of Connecticut, Storrs, CT 06269-3060.

<sup>d</sup> Department of Chemical and Biomolecular Engineering, University of Connecticut, Storrs, CT 06269-3222.

<sup>e</sup> Department of Biomedical Engineering, University of Connecticut, Storrs, CT 06269-3247.

<sup>†</sup> Corresponding Author Email: steven.suib@uconn.edu

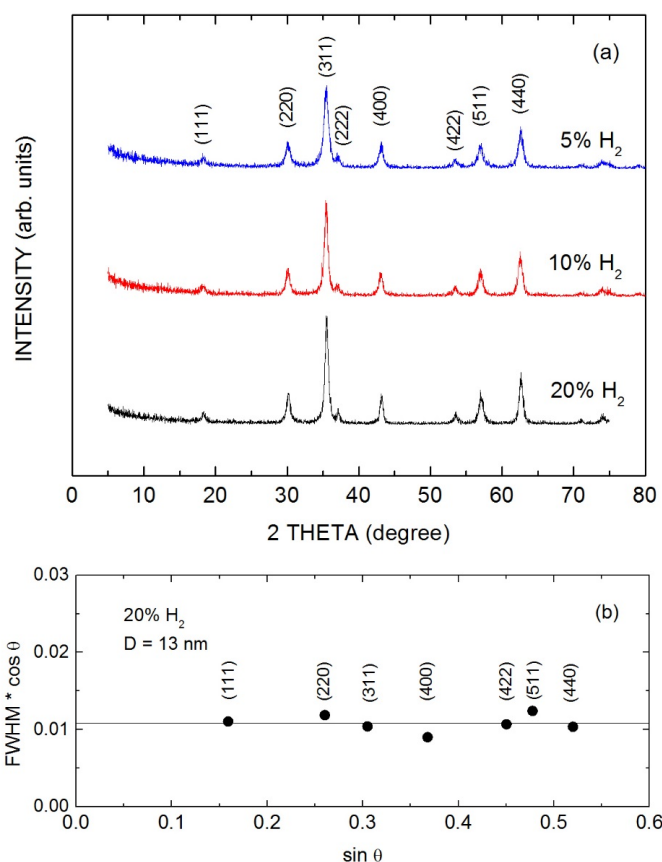

**Figure S1.** (Color Online) (a) Wide-angle PXRD patterns for the three (second series) mesoporous nanostructured samples heated at 250 °C for 3 hrs in 5% H<sub>2</sub>, 10% H<sub>2</sub>, and 20% H<sub>2</sub> atmospheres, and (b) (expanded) Scherrer equation analysis for the grain size in the 20% H<sub>2</sub> sample. The wide-angle pattern is consistent with the spinel Fe<sub>3</sub>O<sub>4</sub> crystalline phase; cubic unit cell with Fd-3m space group (JCPDS no. 85-1436)<sup>20</sup>.

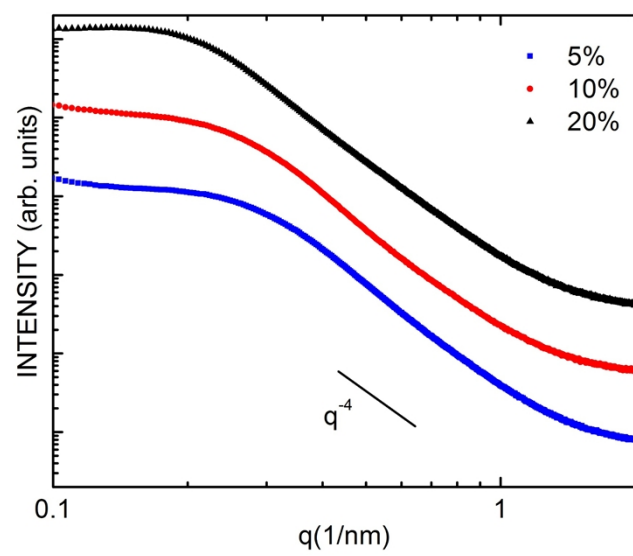

**Figure S2.** (Color Online) 1-D SAXS intensity profiles (log-log plots) obtained by integration of the 2-D data for the three (second series) mesoporous samples heated in 5% H<sub>2</sub>, 10% H<sub>2</sub> and 20% H<sub>2</sub> atmospheres. The “knee”-like features yield estimates for the nanoparticle size (see text).

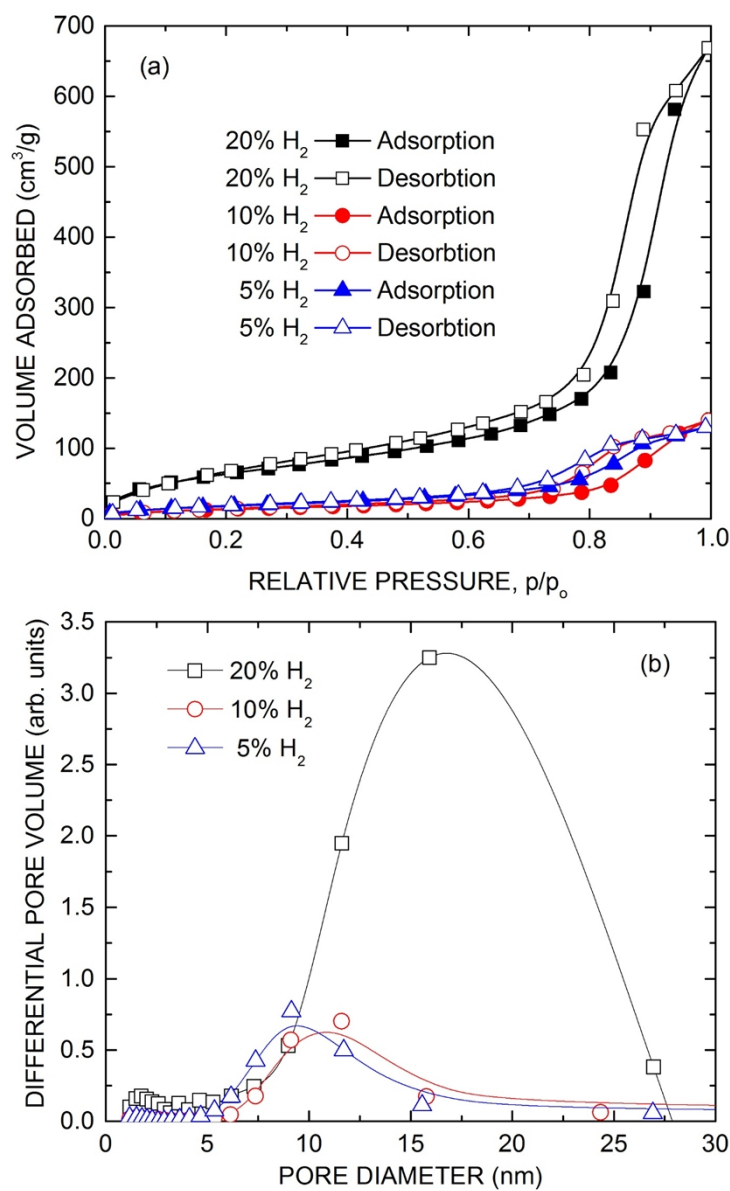

**Figure S3.** (Color Online) (a) Nitrogen sorption isotherms and (b) pore size distribution curves for the three (second) series mesoporous samples heated at 250 °C for 3 hrs in 5%  $\text{H}_2$ , 10%  $\text{H}_2$ , and 20%  $\text{H}_2$  atmospheres. The BET surface areas and BJH pore sizes obtained from analysis of the isotherms are presented in **Table I**. Unlike traditional mesoporous materials, the UCT materials expand with heat treatment.

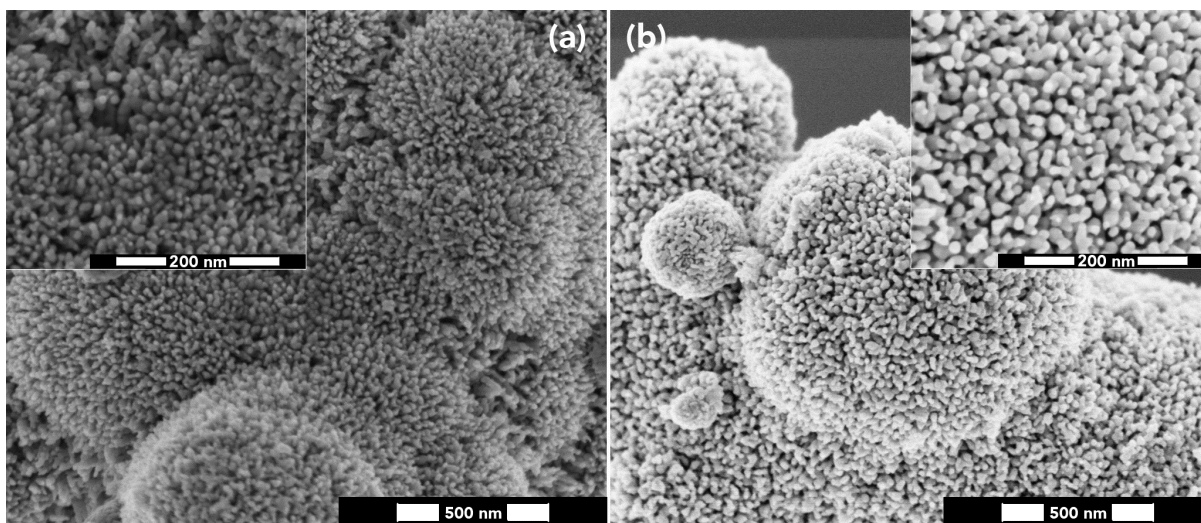

**Figure S4.** Scanning electron microscope images obtained from two of the three (second) series samples: (a) 5% H<sub>2</sub> sample - 500 nm scale bar (inset 200 nm) and (b) 20% H<sub>2</sub> sample - 500 nm scale bar (inset 200 nm). The overall sample morphology can be described as essentially spherical clusters with nanoscale segments.

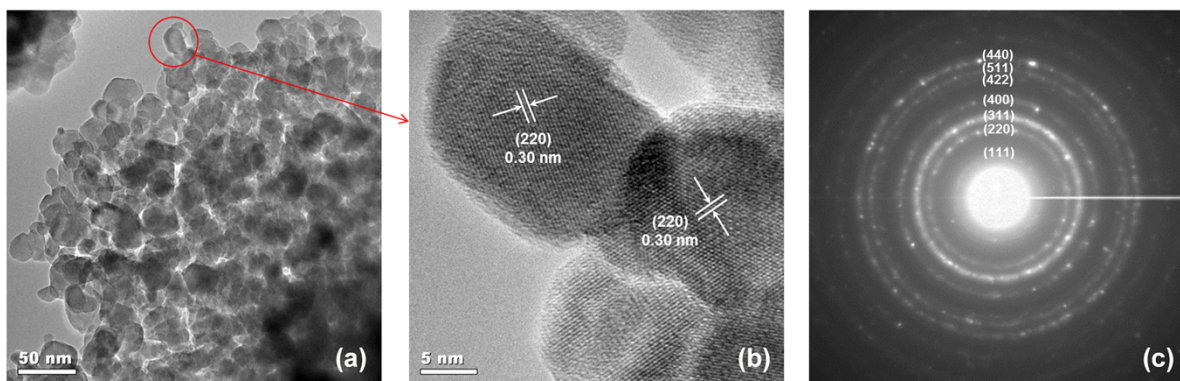

**Figure S5.** Transmission electron microscope images obtained from the sample heated at 250 °C for 3 hrs in a 20% H<sub>2</sub> atmosphere: (a) TEM, 50 nm scale bar, (b) HRTEM, 5 nm scale bar, and (c) SAED pattern with Debye-Scherrer-type rings which can be indexed to the spinel Fe<sub>3</sub>O<sub>4</sub> structure. The mesostructure consists of an assembly of nanoparticles with diameters ranging from 17 nm to 24 nm (see **Figure S5a**). With high resolution (see **Figure S5b**), the d-spacing of the resolved fringes is 0.30 nm, consistent with (200) planes for Fe<sub>3</sub>O<sub>4</sub>.

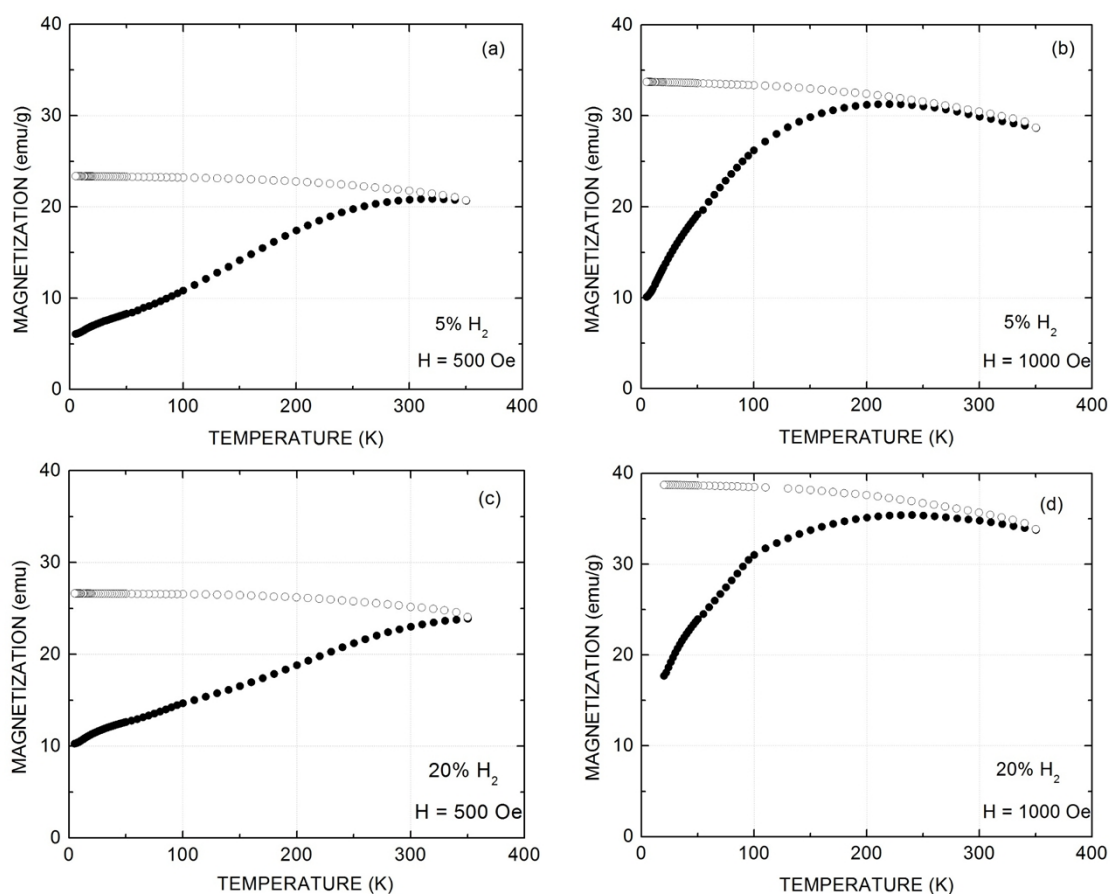

**Figure S6.** Zero-field-cooled (closed symbols) and field-cooled (open symbols) magnetization versus temperature for the sample heated in a 5%  $H_2$  atmosphere at 250 °C for 3 hrs (a)  $H = 500$  Oe and (b)  $H = 1,000$  Oe. Zero-field-cooled (closed symbols) and field-cooled (open symbols) magnetization versus temperature for the sample heated in a 20%  $H_2$  atmosphere at 250 °C for 3 hrs (c)  $H = 500$  Oe and (d)  $H = 1,000$  Oe. The decrease of the peak temperature with magnetic field indicates superparamagnetic behavior; the blocking temperatures  $T_B$  are indicated.

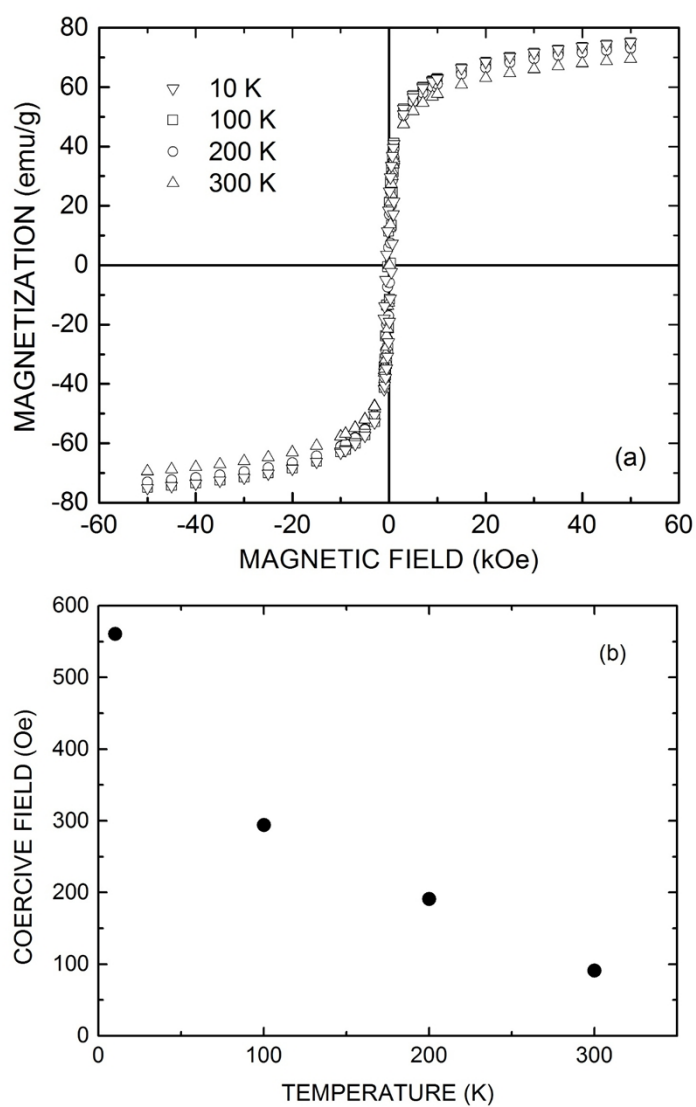

**Figure S7.** (a) Magnetization versus magnetic field (hysteresis loops) measured at temperatures ranging from 10 K to 300 K for the sample heated in a 5% H<sub>2</sub> atmosphere at 250 °C for 3 hrs and (b) temperature dependence of the coercive field values,  $H_c$ , obtained from the hysteresis loops.

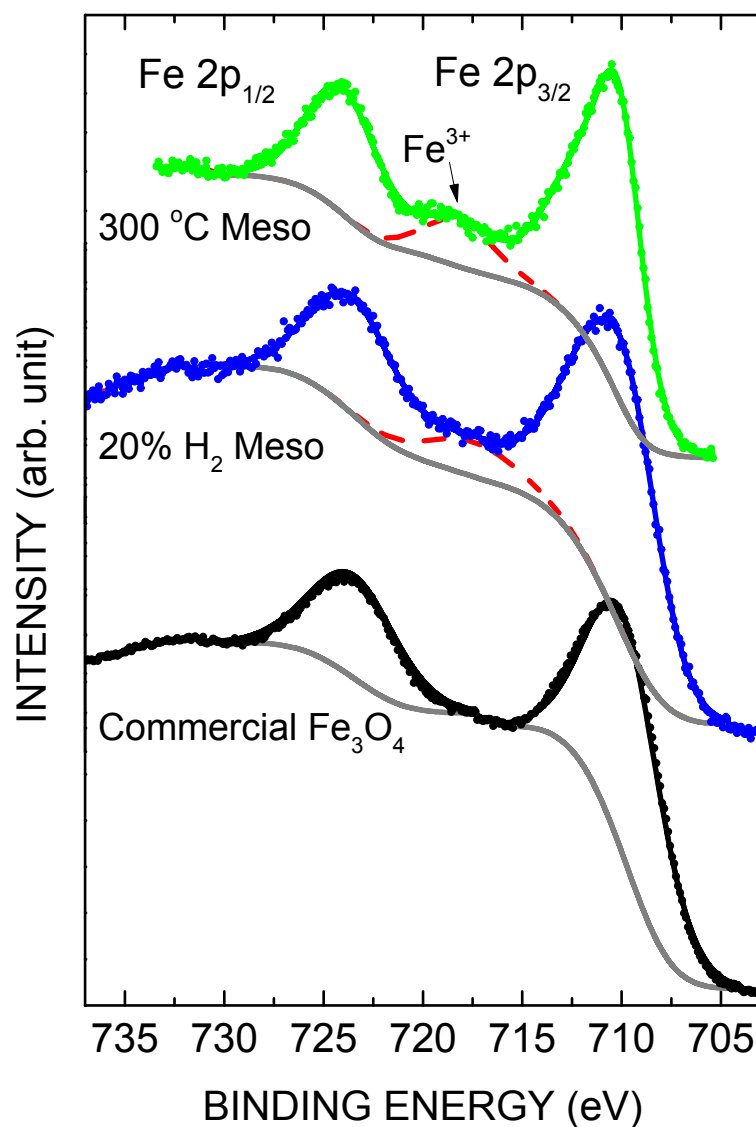

**Figure S8.** X-ray Photoemission Spectrum (XPS) for the 300 °C mesoporous sample (green dots are the data points and the green solid line is the fitting curve), 20% H<sub>2</sub> mesoporous sample (blue dots are the data points and the blue solid line is the fitting curve) and the commercial Fe<sub>3</sub>O<sub>4</sub> (black dots are the data points and the black solid line is the fitting curve). The Shirley backgrounds for each sample are presenting as the solid gray lines. The Fe<sup>3+</sup> satellite peak (red dash line) is clearly observed for the 300 °C mesoporous sample, consistent with the  $\gamma$ -Fe<sub>2</sub>O<sub>3</sub> phase. The satellite structure of the commercial Fe<sub>3</sub>O<sub>4</sub> is completely obscured by the overlapping Fe<sup>2+</sup> and Fe<sup>3+</sup> satellites. The Fe<sup>3+</sup> satellite is only partially obscured by the Fe<sup>2+</sup> satellite for the 20% H<sub>2</sub> mesoporous sample, which indicates a contribution from the  $\gamma$ -Fe<sub>2</sub>O<sub>3</sub> phase.
